# Supplementary material
Source: PubMed Central journal article supplement (PMC3567826)
Supplement: cr2012135x1.pdf [file cr2012135x1.pdf]

## Supplementary information, Table S1

**Table S1** The genotype frequency of the 3 identified *CBS* SNPs in CHD patients and controls

| SNP       | Group    | Genotype | Control     | Case        | <i>P</i> value | HWP   |
|-----------|----------|----------|-------------|-------------|----------------|-------|
| rs2850144 | Shanghai | C/C      | 252 (45.6%) | 126 (46.7%) | <b>0.034*</b>  | 0.086 |
|           |          | G/C      | 228 (41.3%) | 122 (45.2%) |                |       |
|           |          | G/G      | 72 (13%)    | 22 (8.2%)   |                |       |
|           | Shandong | C/C      | 137 (42.3%) | 138 (53.3%) | <b>0.011</b>   | 0.12  |
|           |          | G/C      | 137 (42.3%) | 97 (37.5%)  |                |       |
|           |          | G/G      | 50 (15.4%)  | 24 (9.3%)   |                |       |
| rs1051319 | Shanghai | G/G      | 485 (87.9%) | 240 (88.9%) | 0.78           | 0.71  |
|           |          | G/C      | 66 (12%)    | 29 (10.7%)  |                |       |
|           |          | C/C      | 1 (0.2%)    | 1 (0.4%)    |                |       |
|           | Shandong | G/G      | 272 (84%)   | 222 (85.7%) | 0.57           | 0.71  |
|           |          | G/C      | 51 (15.7%)  | 35 (13.5%)  |                |       |
|           |          | C/C      | 1 (0.3%)    | 2 (0.8%)    |                |       |
| rs706208  | Shanghai | C/C      | 239 (43.3%) | 118 (43.7%) | 0.76           | 0.25  |
|           |          | C/T      | 258 (46.7%) | 121 (44.8%) |                |       |
|           |          | T/T      | 55 (10%)    | 31 (11.5%)  |                |       |
|           | Shandong | C/C      | 147 (45.4%) | 106 (40.9%) | 0.31           | 0.32  |
|           |          | C/T      | 136 (42%)   | 125 (48.3%) |                |       |
|           |          | T/T      | 41 (12.7%)  | 28 (10.8%)  |                |       |

\* In Recessive model
