# Supplementary material
Source: PubMed Central journal article supplement (PMC3567826)
Supplement: cr2012135x2.pdf [file cr2012135x2.pdf]

## Supplementary information, Table S2

**Table S2** Demographic characteristics in CHD cases and controls

| Variable                | Cases     |      | Controls  |      | P value*    |
|-------------------------|-----------|------|-----------|------|-------------|
|                         | No.       | %    | No.       | %    |             |
| Stage 1, Shanghai Group | N=602     |      | N=660     |      |             |
| Age, years (mean±SD)    | 6.21±0.30 |      | 5.95±0.19 |      | <b>0.46</b> |
| Gender                  |           |      |           |      | <b>0.10</b> |
| Male                    | 332       | 55.1 | 394       | 59.7 |             |
| Female                  | 270       | 44.9 | 266       | 40.3 |             |
| Stage 2, Shandong Group | N=735     |      | N=564     |      |             |
| Age, years (mean±SD)    | 6.63±0.25 |      | 7.09±0.14 |      | <b>0.14</b> |
| Gender                  |           |      |           |      | <b>0.85</b> |
| Male                    | 365       | 49.7 | 283       | 50.2 |             |
| Female                  | 370       | 50.3 | 281       | 49.8 |             |
| Stage 3, Jiangsu Group  | N=1003    |      | N=1046    |      |             |
| Age, years (mean±SD)    | 6.78±0.31 |      | 6.72±0.29 |      | <b>0.86</b> |
| Gender                  |           |      |           |      | <b>0.73</b> |
| Male                    | 528       | 52.6 | 558       | 53.3 |             |
| Female                  | 475       | 47.4 | 488       | 46.7 |             |
| Combined samples        | N=2340    |      | N=2270    |      |             |
| Age, years (mean±SD)    | 6.59±0.17 |      | 6.59±0.15 |      | <b>0.99</b> |
| Gender                  |           |      |           |      | <b>0.16</b> |
| Male                    | 1225      | 52.4 | 1235      | 54.4 |             |
| Female                  | 1115      | 47.6 | 1035      | 45.6 |             |
| CHD classification I    |           |      |           |      |             |
| Conotruncal defects     | 386       | 16.5 |           |      |             |
| Septation defects       | 1652      | 70.6 |           |      |             |
| LVOTO                   | 47        | 2.0  |           |      |             |
| RVOTO                   | 75        | 3.2  |           |      |             |
| APVR                    | 14        | 0.6  |           |      |             |
| Complex CHDs            | 34        | 1.5  |           |      |             |
| Other CHDs              | 132       | 5.6  |           |      |             |
| CHD classification II   |           |      |           |      |             |
| Isolated CHD            | 2025      | 86.5 |           |      |             |
| Nonisolated CHD         | 315       | 13.5 |           |      |             |
| Isolated CHD phenotype  |           |      |           |      |             |
| VSD                     | 1220      | 52.1 |           |      |             |
| ASD                     | 235       | 10.0 |           |      |             |
| TOF                     | 291       | 12.4 |           |      |             |

\*All comparisons by 2-tailed  $\chi^2$  test. Data shown in the table are means±SD.
