# Supplementary material
Source: PubMed Central journal article supplement (PMC3567826)
Supplement: cr2012135x3.pdf [file cr2012135x3.pdf]

## Supplementary information, Table S3

**Table S3** DNA sequence of all used primer pairs

| Primer Name      | Sequence (5'-3')                            | Purpose      |
|------------------|---------------------------------------------|--------------|
| CBSF1            | GTGAGCCACAGCTCAGCAAC                        | PCR/Sequence |
| CBSR1            | TTCCCTCATCCAGATTTTCCA                       | PCR/Sequence |
| CBSF2            | TGGAGAGACAGAGAGGGAGCA                       | PCR/Sequence |
| CBSR2            | CTGCCACCAGACGAGAAATG                        | PCR/Sequence |
| CBSF3            | CAGGCTGGCTGAAGGCTCT                         | PCR/Sequence |
| CBSR3            | CGCAGAACAGTCGCCTTG                          | PCR/Sequence |
| CBSF4            | GGGCGCCCCTGCTACCAC                          | PCR/Sequence |
| CBSR4            | TCACCTGGACGGATACATGG                        | PCR/Sequence |
| CBSF5            | AAGTCCAGTCAGCGGCAGAT                        | PCR/Sequence |
| CBSR5            | CCAGGTGTCCATCACCGATA                        | PCR/Sequence |
| rs2850144-typing | CGGCCCCGCGCAGCTCCGCCG                       | Genotyping   |
| rs1051319-typing | GGGGAGACGGATGCTCTGTGCCGT                    | Genotyping   |
| rs706208-typing  | GCACCACCTCTGTCACGTTT                        | Genotyping   |
| CBS-promt -F     | CATCTAGCTAGCTAGATGAAACCCCGTCTCTACTAAAATACAA | Construct    |
| CBS-promt-R      | ACACCCAAGCTTGGGTGTTCCGATGCTGTTTTACTTGGTTA   | Construct    |
| -551C-probe-F    | GTGGCAGAGACCCCGGCGGAGCTGC                   | SPR/EMSA     |
| -551C-probe-R    | GCAGCTCCGCCGGGGTCTCTGCCAC                   | SPR/EMSA     |

|               |                               |             |
|---------------|-------------------------------|-------------|
| -551G-probe-F | GTGGCAGAGACCGCGGGCGGAGCTGC    | SPR/EMSA    |
| -551G-probe-R | GCAGCTCCGCCGCGGTCTCTGCCAC     | SPR/EMSA    |
| -516G-probe-F | GGAGGCTGCGGAGCATCGCTCTGAC     | SPR         |
| -516G-probe-R | GTCAGAGCGATGCTCCGCAGCCTCC     | SPR         |
| -516A-probe-F | GGAGGCTGCGGAACATCGCTCTGAC     | SPR         |
| -516A-probe-R | GTCAGAGCGATGTTCCGCAGCCTCC     | SPR         |
| CBS -CHIP F   | GTA ACTCCATCCCTGTCCCCT        | CHIP        |
| CBS -CHIP R   | ATGCTCCGCAGCCTCCTC            | CHIP        |
| CBS-mRNA-F    | CACCCCTATGGTCAGAATCAAC        | RT-qPCR     |
| CBS-mRNA-R    | AGCATCCTCAATCATCCGCA          | RT-qPCR     |
| GAPDH-mRNA-F  | GAAGGTGAAGGTCGGAGTC           | RT-qPCR     |
| GAPDH-mRNA-R  | GAAGATGGTGATGGGATTTTC         | RT-qPCR     |
| CBS-methy-F   | TTTGTTAGTGGATATTTAATTTTAATTTA | Methylation |
| CBS-methy-R   | ACTTTCAAAAACCTAACCTAATCCC     | Methylation |

---
