# Supplementary material
Source: PubMed Central journal article supplement (PMC3567826)
Supplement: cr2012135x4.pdf [file cr2012135x4.pdf]

## Supplementary information, Figure S1

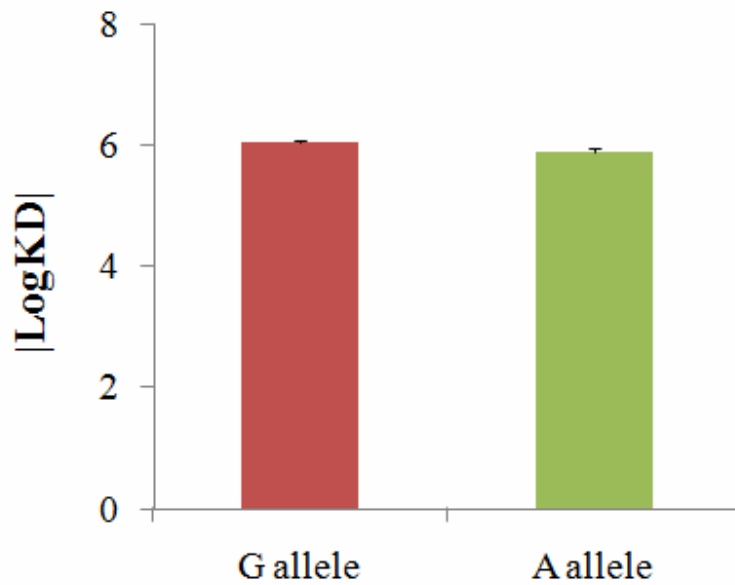

**Figure S1** SPR analysis shows that *CBS* -4638G>A does not change the binding affinity with nuclear extracts. Data shown are mean  $\pm$  SD. The actual values for each group are as follows: G allele,  $6.02 \pm 0.06$ ; A allele,  $5.86 \pm 0.14$ . All values represent the mean  $\pm$  SD from 3 independent experiments.
